# Supplementary material
Source: publisher figshare collection journal article supplement (https://sage.figshare.com/ndownloader/files/18120788)
Supplement: Supplementary file 1 [file 18120788]

Building Public Schools in the City:  
The Role of Neighborhood Context on Voter Support for School Bonds

(Appendix)

**Table A.1: Random Intercept Model of Effect of Neighborhood Context on Support for School Bond**

|                                | <b>Model 1</b>                               | <b>Model 2</b>                                     |
|--------------------------------|----------------------------------------------|----------------------------------------------------|
|                                | <i>Non-Latino Sample</i><br>Coefficient (SE) | <i>Non-Latino White Sample</i><br>Coefficient (SE) |
| Percent Latino in neighborhood | -.007*<br>(.004)                             |                                                    |
| Percent black in neighborhood  |                                              | .012*<br>(.008)                                    |
| Homeowner                      | -.727**<br>(.323)                            | -.960**<br>(.440)                                  |
| Child(ren) in HISD             | .281*<br>(.209)                              | .554**<br>(.274)                                   |
| Education                      | .103**<br>(.036)                             | .179**<br>(.083)                                   |
| Income                         | .106**<br>(.046)                             | .164***<br>(.059)                                  |
| Senior Citizen                 | -.181<br>(.217)                              | -.274<br>(.274)                                    |
| Democrat                       | 1.086***<br>(.275)                           | 1.162***<br>(.374)                                 |
| Republican                     | -.241<br>(.164)                              | -.150<br>(.336)                                    |
| Male                           | -.300*<br>(.201)                             | -.356*<br>(.253)                                   |
| Intercept                      | -.339<br>(.513)                              | -1.382**<br>(.739)                                 |

\*p &lt; .10 (one tailed test)

\*\*p &lt; .05 (one tailed test)

\*\*\*p &lt; .01 (one tailed test)
